# Supplementary material for: Prognostic accuracy of preoperative nutritional indicators of survival in head and neck cancer patients
Source: PeerJ. 2025 Jun 26;13:e19496. doi: 10.7717/peerj.19496 (PMC12206401; doi:10.7717/peerj.19496)
Supplement: Supplemental Information 1 [file peerj-13-19496-s001.xlsx]

## Sheet: Plan1
Registry	age	gender	education	income	primary site	subsite	clinical stage	ASA	alcoholism	smoking	BMI	Calf circun	AMPT	TSF	%WL	surgery	CLAVIEN-DINDO	hospitalization (days)	death	survival (months)
1	72	2	1	2	1	4	4	2	1	1	31.36	40.5	10	23	2.9	12	0	8	0	75
2	66	1	2	2	4	26	2	2	1	1	22.85	31	4	8	0	16	2	17	1	43
3	55	1	3	0	1	2	3	2	1	1	24.02	35	8	8	0	12	0	6	1	30
4	64	1	0	1	4	26	4	2	1	1	18.68	33	3	3	4.58	8	0	6	1	0
5	72	1	3	1	1	2	4	2	0	1	27.88	32	9	8	0	10	2	30	1	18
6	68	1	1	2	4	26	2	2	1	1	27.16	35.5	11	18	0	15	0	8	1	24
7	55	1	2	0	4	26	2	2	1	1	27.53	42.5	9	11	0	16	0	9	1	23
8	53	1	1	1	4	26	4	2	1	0	28.09	37	12	6	2.1	4	4	8	1	61
9	72	1	1	1	1	3	4	2	1	1	24.8	35	3	9	0	8	2	13	1	16
10	65	1	0	1	1	3	4	2	1	1	24.74	35.5	4	9	17.85	12	2	17	1	25
11	68	1	1	2	1	3	4	2	1	1	24.73	35	8	12	0	12	2	31	0	67
12	59	1	1	0	1	1	3	2	1	1	23.2	30	4	6	6.3	12	5	3	1	0
13	73	1	1	1	4	26	4	2	1	1	25.93	35	10	5	8.8	16	0	9	0	66
14	77	2	0	2	1	3	3	2	0	0	16.03	27	6	8	14.34	11	3	36	1	3
15	79	1	1	1	4	26	4	2	1	1	22.81	32.7	4	6	2.3	16	2	9	1	60
16	76	2	0	1	4	26	3	2	0	1	27.85	32.3	9	18	7.35	8	0	8	0	64
17	67	1	0	1	1	1	3	2	1	1	21.5	34.5	10	8	7.35	11	2	16	1	7
18	56	1	1	1	1	3	2	2	0	1	17.74	27.5	10	3	1.9	10	3	9	1	4
19	46	1	1	0	1	3	4	2	1	1	19.15	32	10	5	0	10	5	41	1	1
20	67	1	0	1	1	1	4	2	1	1	21.61	33	12	5	7.5	10	2	33	1	3
21	66	1	0	1	4	26	2	2	1	1	27.58	37.2	13	12	0	16	0	20	1	39
22	55	1	1	1	1	3	3	2	1	1	21.45	32.5	15	8	8.06	12	3	26	1	6
23	74	1	1	1	4	26	3	2	1	1	32.8	40	14	13	0	16	5	12	1	0
24	55	1	1	0	4	26	2	2	1	0	24.37	35.4	10	13	0	16	2	11	0	60
25	74	1	3	2	1	3	4	2	1	1	19.01	30	9	6	9.52	10	2	28	1	7
26	71	1	1	1	4	26	4	2	1	1	19.57	31.4	9	4	10.96	8	5	12	1	0
27	64	1	1	0	4	26	4	2	1	1	17.7	31.3	12	5	0	8	5	46	1	1
28	54	1	1	3	1	1	3	2	1	1	25.87	37.6	14	8	0	12	0	6	0	59
29	54	1	1	0	4	23	2	2	1	1	22.83	35	15	8	0	16	0	10	0	58
30	60	2	1	1	1	3	4	2	1	1	18.42	28.9	11	10	8.69	9	0	7	1	14
31	76	1	1	1	4	26	4	2	1	1	22.18	34.7	9	8	4.55	8	0	9	0	57
32	63	1	1	2	4	26	4	2	1	1	20.53	29.4	11	5	4.25	8	3	38	1	26
33	55	1	1	1	4	26	2	2	1	1	20.3	34	12	6	0	15	0	7	0	57
34	57	1	0	0	4	26	2	2	1	1	26.5	33	11	9	0	16	0	9	1	33
35	67	1	0	1	4	26	2	2	1	1	26.2	35	12	11	0	8	0	13	0	56
36	67	1	3	2	4	26	4	2	1	1	24.28	35.7	8	12	6.25	8	0	8	0	55
37	59	1	1	2	1	3	2	2	1	1	28.7	38.5	15	16	0	15	0	6	0	54
38	79	2	1	1	4	26	4	2	1	0	18.44	28	5	9	7.39	8	5	15	1	0
39	78	1	1	1	1	3	4	2	1	1	23.54	31.5	14	10	6.25	10	0	11	0	54
40	64	1	1	1	4	26	4	2	1	1	23.18	35	14	10	2.81	15	0	8	0	52
41	68	1	0	0	4	26	3	2	1	1	22.67	35	12	4	6.22	8	0	11	1	9
42	70	2	0	1	1	3	4	2	1	1	20.04	38.5	4	8	8.8	12	2	27	1	39
43	61	1	1	0	4	26	3	2	1	1	26.56	34	8	12	0	8	0	8	0	51
44	49	1	1	0	4	26	4	2	1	1	21.8	33	13	10	1.2	15	0	9	1	10
45	47	1	1	1	4	26	3	2	1	1	23.28	35	10	9	0	8	0	7	0	50
46	75	1	1	2	4	26	2	2	1	1	24.13	37.5	14	15	4.7	8	2	14	1	7
47	72	1	1	1	1	1	3	2	1	1	20.5	33	13	5	1.85	12	0	10	1	13
48	68	1	1	1	1	1	4	2	1	1	19.1	30	8	6	8.33	12	5	999	1	0
49	54	2	1	1	1	1	4	2	1	1	23.3	33	10	13	9.37	12	0	11	0	47
50	53	2	1	0	1	3	2	2	1	1	19.26	27.5	9	13	4	11	0	8	0	47
51	41	2	3	1	1	8	2	2	1	0	33.2	37	14	34	0	11	0	5	0	45
52	56	1	3	2	1	8	3	2	0	1	19.37	33	14	4	12.5	12	3	29	1	15
53	79	1	1	1	4	26	3	2	1	1	22.6	32	7	11	4.76	13	5	46	1	1
54	47	1	1	0	1	1	3	2	1	1	22.5	33.5	14	9	4.6	9	2	30	1	7
55	78	1	0	1	4	26	4	2	1	1	26.9	38	16	10	0	14	0	11	1	31
56	72	1	1	1	4	26	4	2	1	1	20.3	31	8	6	4	8	5	7	1	0
57	70	1	2	2	1	8	4	2	1	1	19	32	6	7	8.6	10	0	7	0	42
58	64	1	1	1	1	3	4	2	1	1	23.9	33	15	9	0	10	2	15	0	41
59	65	1	0	1	4	26	3	2	1	1	26.37	32	13	11	0	8	3	22	0	40
60	51	1	1	1	2	8	2	2	1	0	23.9	38	14	9	10.5	13	0	5	0	40
61	70	1	1	1	4	26	4	2	1	1	20.4	32.5	10	6	0	8	2	7	1	2
62	66	2	2	1	4	26	2	2	1	1	29.77	40	18	22	0	15	0	5	0	38
63	49	2	1	0	1	3	2	2	1	0	27.26	35.2	13	24	4.5	11	0	5	0	38
64	48	1	1	1	1	3	4	2	1	1	22.2	32	16	10	0	12	0	6	0	22
65	67	1	2	3	4	26	2	2	1	1	29.44	41	20	16	0	16	0	6	0	22
66	66	1	1	1	4	26	1	2	0	0	20.56	32	11	9	5	8	0	5	0	19
67	62	1	1	1	4	23	2	2	1	1	28.36	37.5	14	7	4.16	16	0	6	0	18
68	74	1	0	1	1	3	2	2	0	0	24.2	29	8	18	5	12	3	20	1	18
69	66	1	0	1	4	26	2	2	1	1	24.7	38	10	12	0	16	0	5	0	21
70	71	1	1	1	4	26	4	2	1	1	23.7	34	11	14	0	8	0	5	1	0
71	43	1	1	0	4	26	4	2	1	1	22.58	33	13	9	9.09	8	0	6	0	17
72	60	1	1	2	1	1	2	2	1	1	22.05	36	13	8	5.3	10	0	7	0	15
73	84	2	0	1	1	3	4	2	1	1	24.8	30	5	18	12.3	10	0	8	0	9
74	51	1	1	1	1	3	1	2	1	1	20.6	32	4	11	14.7	20	0	8	0	9
75	48	1	1	1	1	1	2	2	1	1	20.5	30	7	8	0	10	0	10	0	9
76	65	1	1	1	4	26	4	2	1	1	19.2	32	6	7	0	8	0	8	0	5
77	80	2	0	1	2	8	3	2	1	1	25.86	37	7	16	13.4	10	0	8	0	3
78	62	1	2	3	2	8	2	2	1	0	27.7	38	15	14	0	0	3.8	0	0	3
